# Supplementary material for: A Soybean Sucrose Non-Fermenting Protein Kinase 1 Gene, GmSNF1, Positively Regulates Plant Response to Salt and Salt–Alkali Stress in Transgenic Plants
Source: MDPI journal article supplement (doi:10.3390/ijms241512482), 2023-08-05
Supplement: s1 [file s1]

Table S1: Primers used in qRT PCR analysis

| Gene             | Sequence (5'-3')                                        | Purpose                                                                                                          |
|------------------|---------------------------------------------------------|------------------------------------------------------------------------------------------------------------------|
| <i>GmActin11</i> | F: GCGGGAAATTGTAAGGGATGT<br>R: TCGCCAATAGTGATGACCTG     | Internal reference gene for <i>GmSNF1</i> expression analysis<br>in soybean hairy roots and gene silenced plants |
| <i>GmSNF1</i>    | F: TGAGCTCCAACATTGGTGTGG<br>R: ACACGCACAGGGCTAAGGATTC   | <i>GmSNF1</i> gene expression analysis                                                                           |
| <i>GmABI1</i>    | F: TGCCAGGGCTACTGATTTGG<br>R: CCCCATAGCGGGGTACAATC      | <i>GmABI1</i> gene expression analysis                                                                           |
| <i>GmABI2</i>    | F: AAACGGTCGCAGGTTCAGAT<br>R: GCCACAGCAAGAGGATCAGT      | <i>GmABI2</i> gene expression analysis                                                                           |
| <i>GmCAT</i>     | F: ATGAGATCCGCAGTGTCTGG<br>R: GGCCTCGTGCTGAGATGAGA      | <i>GmCAT</i> gene expression analysis                                                                            |
| <i>GmSNF4</i>    | F: GTGGAAGCTAATCCGAGGA<br>R: GACTGGGGAAGCAACTCATGC      | <i>GmSNF4</i> gene expression analysis                                                                           |
| <i>GmERF7</i>    | F: CTGCATTGGCGTCTTTGCTCAG<br>R: TCATAGGGTTTCCAGCAGCATCC | <i>GmERF7</i> gene expression analysis                                                                           |
| <i>GmPKS4</i>    | F: GTTCGATTTGTGCGCCGTTGT<br>R: CTTCCAATCTCGAAATCACGCT   | <i>GmPKS4</i> gene expression analysis                                                                           |

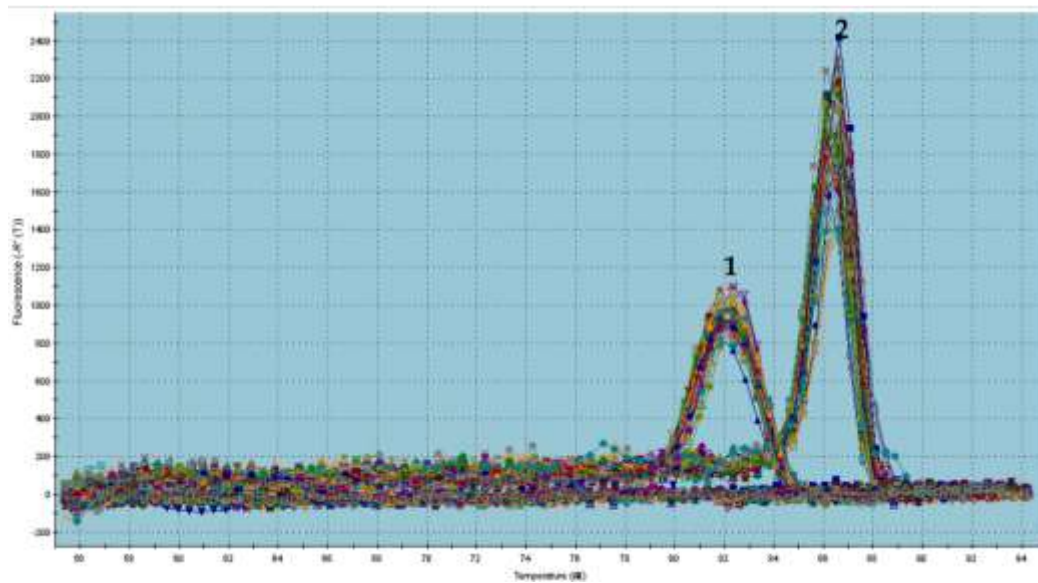

**Figure S1** Melting curve analysis of *GmSNF1* gene in soybean roots under salt, salt-alkali, drought, and ABA stresses at 0 h, 1 h, 3 h, 6 h, 12 h, 24 h, 48 h. 1 represents for *GmActin11* gene; 2 represents for *GmSNF1* gene.

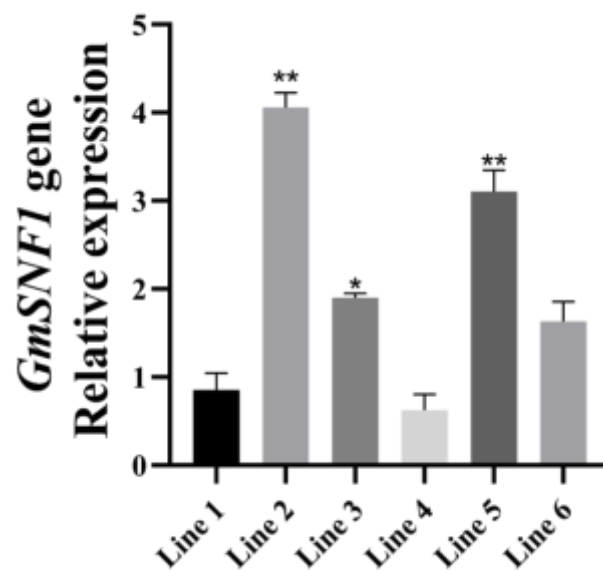

**Figure S2** Checking for *GmSNF1* gene expression level in the six selected T3 homozygotes *Arabidopsis* lines. 25-day-old *Arabidopsis* samples were used. Data represent mean and standard deviation of three repeats ( $n = 3$ ). Significant differences were determined by unpaired two-sided Student's *t*-tests (\*,  $P < 0.05$ ; \*\*,  $P < 0.01$ ).

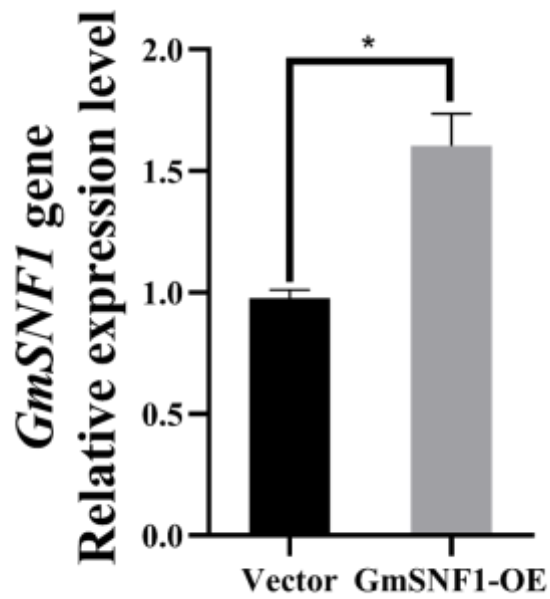

**Figure S3** Expression of *GmSNF1* in vector controls and transgenic soybeans. Data represent mean and standard deviation of three repeats (n = 3). Significant differences were determined by unpaired two-sided Student's t-tests (\*,  $P < 0.05$ ).

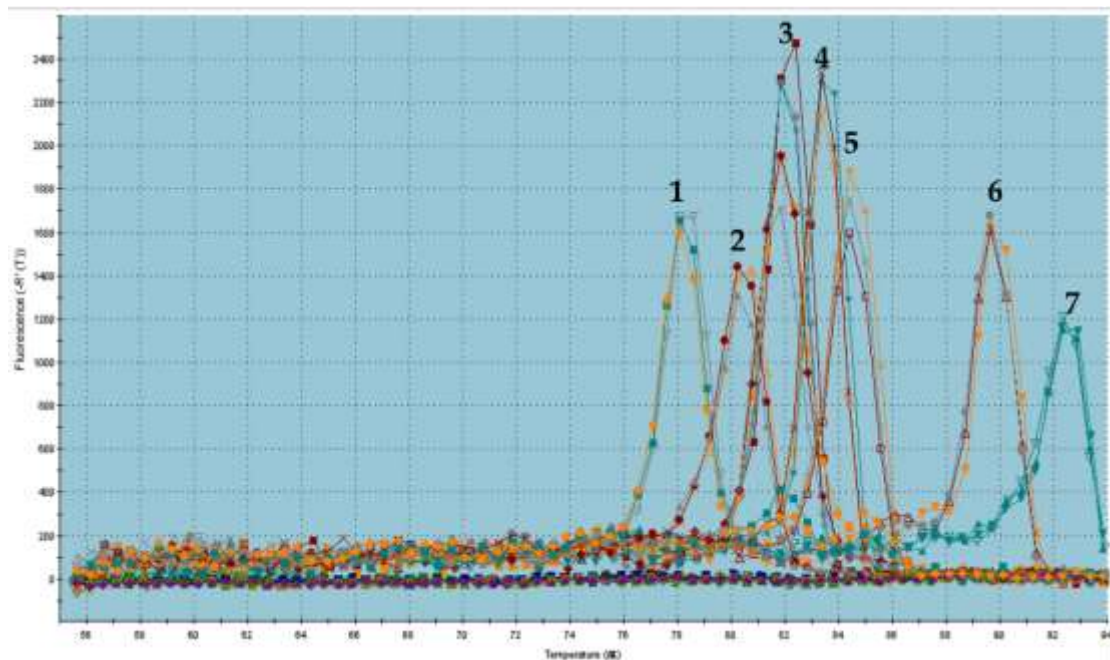

**Figure S4** Melting curve analysis of some stress-related genes in *GmSNF1*-OE soybean plants under salt-alkali stress. 1 represents for *GmPKS4* gene; 2 represents for *GmActin11* gene; 3 represents for *GmABI1* gene; 4 represents for *GmABI2* gene; 5 represents for *GmSNF4* gene; 6 represents for *GmCAT* gene; and 7 represents for *GmERF7* gene.

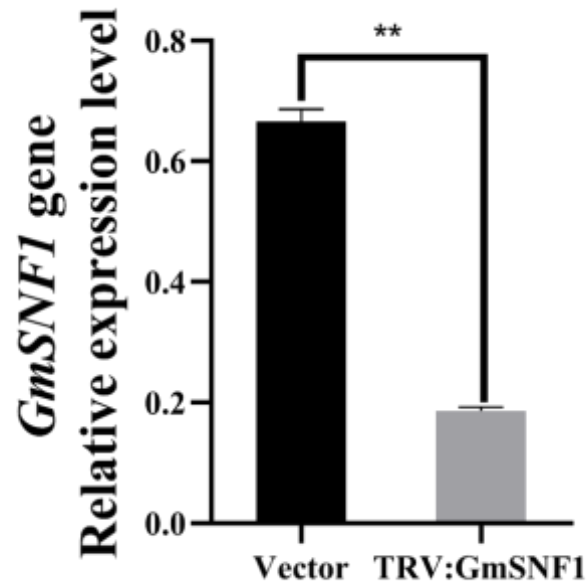

**Figure S5** Expression of *GmSNF1* in vector controls and gene-silenced soybeans. Data represent mean and standard deviation of three repeats (n = 3). Significant differences were determined by unpaired two-sided Student's t-tests (\*\*,  $P < 0.01$ ).

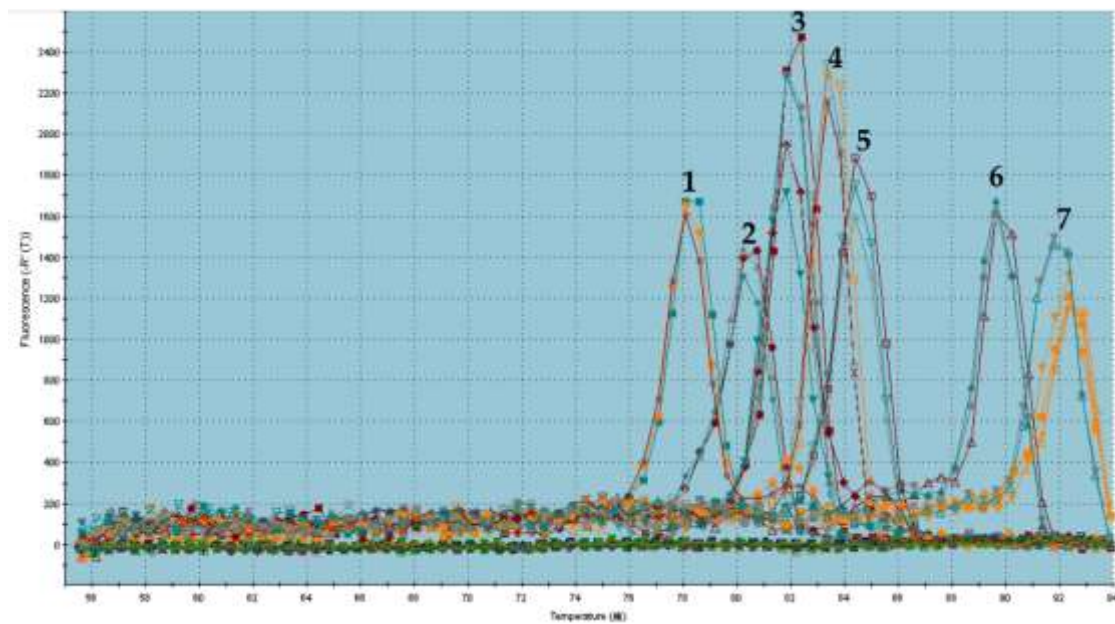

**Figure S6** Melting curve analysis of some stress-related genes in *GmSNF1* gene-silenced soybean plants under salt-alkali stress. 1 represents for *GmPKS4* gene; 2 represents for *GmActin11* gene; 3 represents for *GmABI1* gene; 4 represents for *GmABI2* gene; 5 represents for *GmSNF4* gene; 6 represents for *GmCAT* gene; and 7 represents for *GmERF7* gene.

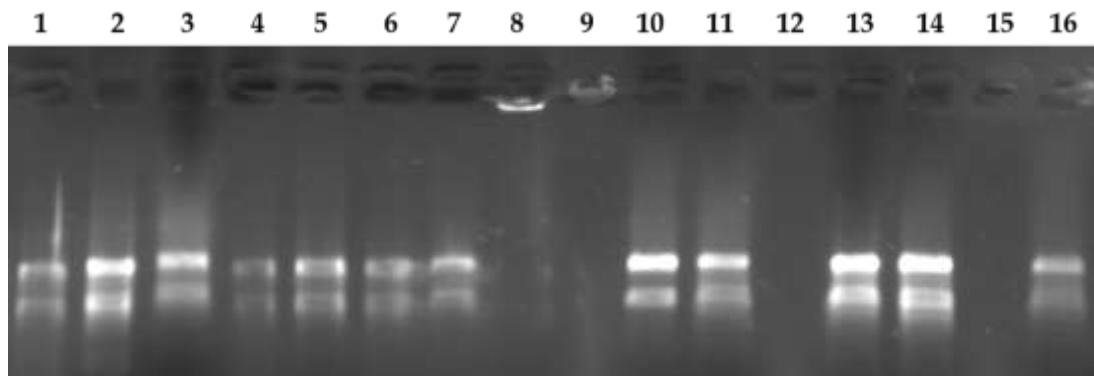

**Figure S7** Extraction of RNA from soybean roots under salt and salt-alkali stress. 1, 2, 3, 4, 5, 6, 7 are salt treated at 0 h, 1 h, 3 h, 6 h, 12 h, 24 h, 48 h; 10, 11, 13, 14, 16 are salt-alkali treated at 1 h, 3 h, 6 h, 12 h, 24 h, respectively (The degraded RNA of some samples had been re-extracted.).

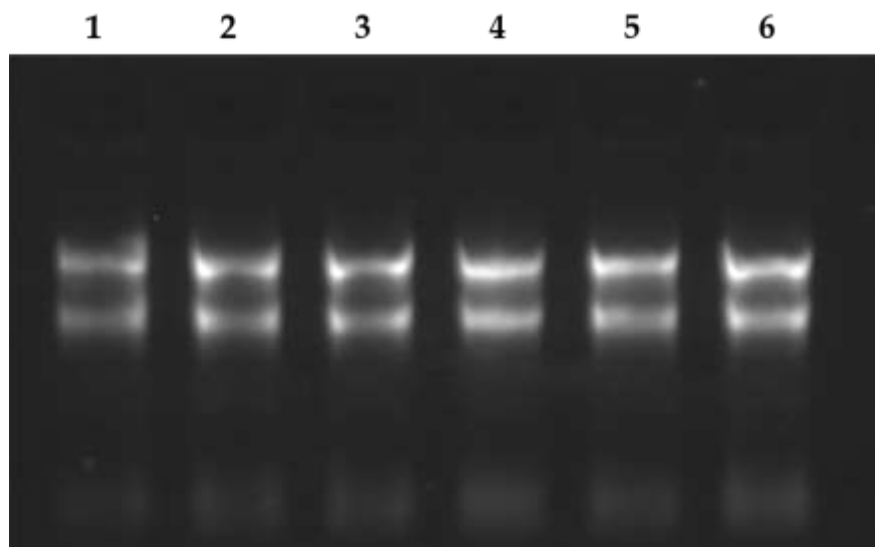

**Figure S8** Extraction of RNA from soybean leaves under salt stress. 1, 2, 3, 4, 5, 6 represent for leaves treated under salt stress at 1 h, 3 h, 6 h, 12 h, 24 h, 48 h, respectively.

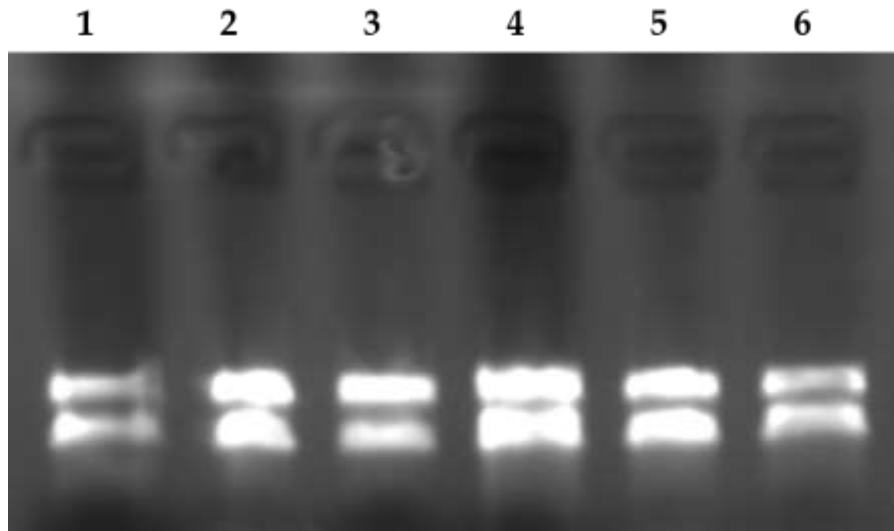

**Figure S9** Extraction of RNA from GmSNF1-OE soybean plants under salt and salt-alkali stresses. 1, 3, and 5 represent for control plants under no treatment, salt treatment, and salt-alkali treatment, respectively; 2, 4, and 6 represent for GmSNF1-OE plants under no treatment, salt treatment, and salt-alkali treatment, respectively.

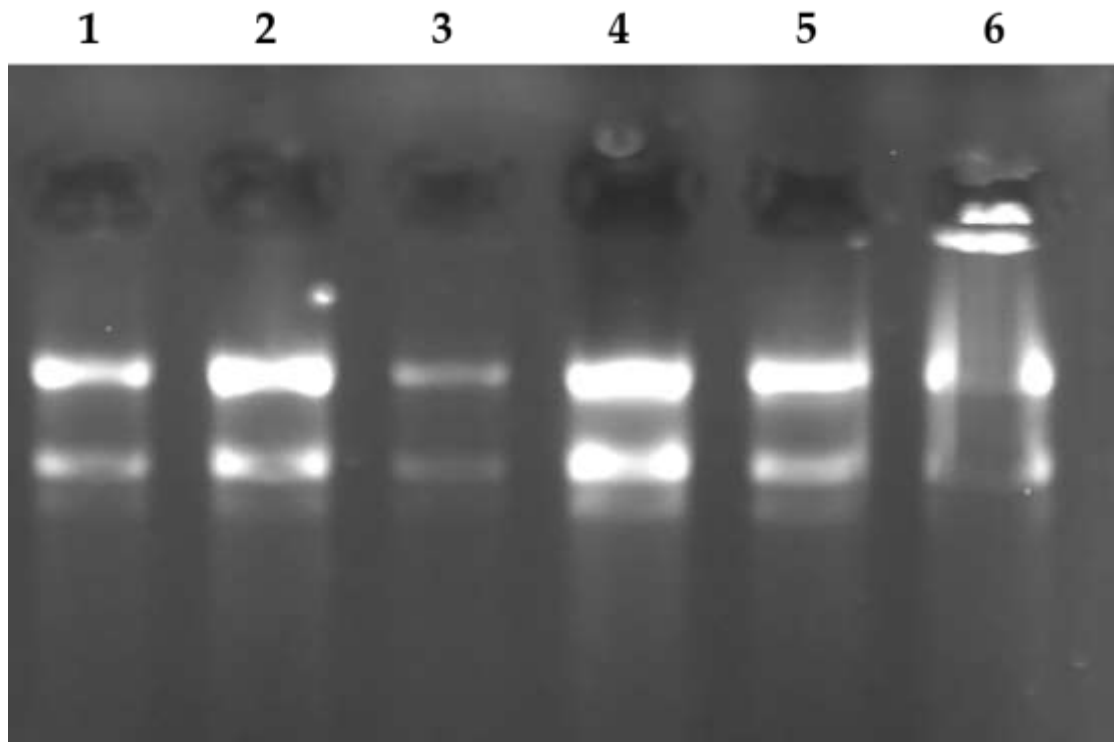

**Figure S10** Extraction of RNA from soybean *GmSNF1* gene-silenced plants under salt and salt-alkali stress. 1, 3, and 5 represent for control plants under no treatment, salt treatment, and salt-alkali treatment, respectively; 2, 4, and 6 represent *GmSNF1* gene-silenced plants under no treatment, salt treatment, and salt-alkali treatment, respectively (The degraded RNA of some samples, such as 3 and 6, had been re-extracted for the experiment.).
